# Supplementary material for: Negligible Effect of Sodium Chloride on the Development and Function of TGF-β-Induced CD4+ Foxp3+ Regulatory T Cells
Source: PubMed Central journal article supplement — Cell Rep. Author manuscript; Available in PMC 2020 Jan 8. (PMC6948355; doi:10.1016/j.celrep.2019.01.066), 2019-02-12
Supplement: NIHMS1521871-supplement-1.pdf [file NIHMS1521871-supplement-1.pdf]

**Cell Reports, Volume 26**

**Supplemental Information**

**Negligible Effect of Sodium Chloride  
on the Development and Function  
of TGF- $\beta$ -Induced CD4<sup>+</sup> Foxp3<sup>+</sup> Regulatory T Cells**

**Yang Luo, Youqiu Xue, Julie Wang, Junlong Dang, Qiannan Fang, Gonghua Huang, Nancy Olsen, and Song Guo Zheng**

## Supplemental Information

### Supplemental figures

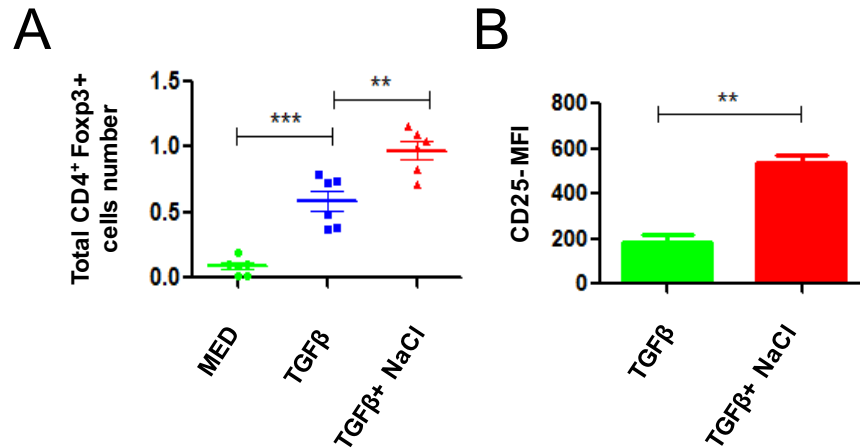

**Figure S1. High-salt condition boosts iTreg cells proliferation and activation. Related to Figure 1.** Splenic naïve CD4<sup>+</sup> T cells were stimulated with anti-CD3/28 beads (5 cells per bead) in the presence of rmIL-2 (50 U/ml) and ±TGF-β (2 ng/ml) (iTreg/MED) in standard media, or with additional 40mM NaCl for 3 days. (A) Total GFP-Foxp3<sup>+</sup> cells and mean fluorescence intensity (MFI) of CD25 expression (B) were analyzed. The data represent a summary of independent experiments (n=6). Statistical analyses were performed using one-way ANOVA. \*\*P<0.01; \*\*\*P<0.001.

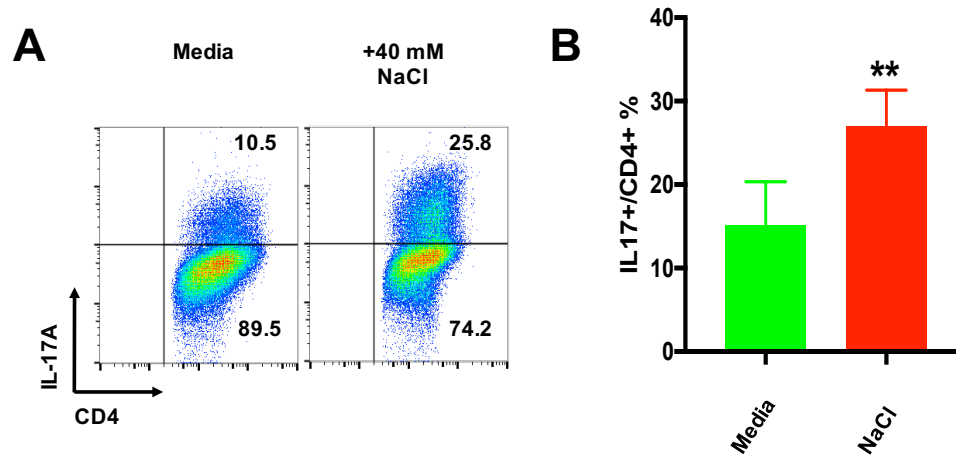

**Figure S2. NaCl potentiates Th17 cells differentiation *in vitro*. Related to Figure 1.**

(A) Naïve T cells were stimulated with 40 mM NaCl under Th17 differentiating conditions (TGF- $\beta$  and IL-6) for 3 days, and analyzed by flow cytometry for IL-17A. (B) The bar graph depicts a summary of independent experiments (n=5). Statistical analyses were performed using Student's t test. \*\*P<0.01.

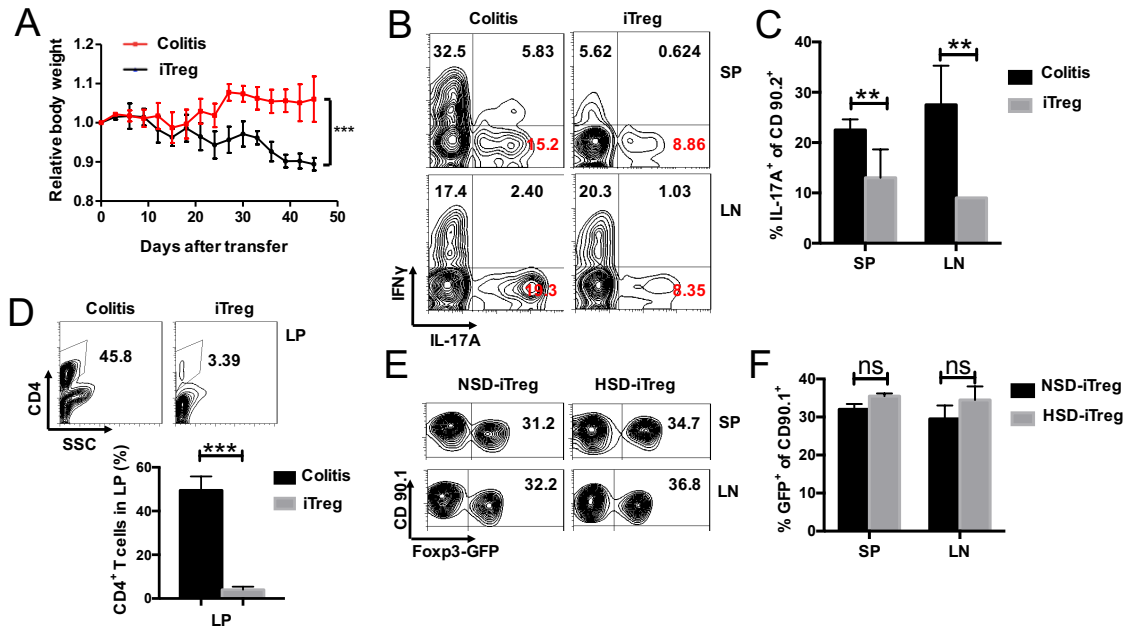

**Figure S3. High-salt diet does not affect the suppressive function of iTregs *in vivo*.** Related to Figure 3. iTregs were prepared from CD90.1<sup>+</sup> Foxp3- GFP knock-in mice. Naïve CD4<sup>+</sup> (CD90.2<sup>+</sup>CD4<sup>+</sup>CD25<sup>-</sup>CD62L<sup>+</sup>CD44<sup>-</sup>) cells from C57BL/6 mice alone or together with CD90.1<sup>+</sup> iTregs were adoptively transferred into Rag1<sup>-/-</sup> mice i.p.. The mice were killed at 6 weeks after the cell transfer, and analyzed for disease severity (6 mice in each group in one experiment). (A) Body weight of the recipient mice was presented as a percentage of the initial weight. (B and C) CD4<sup>+</sup> cells from the spleen (SP) and mesenteric lymph nodes (LN) were examined. Flow cytometric analysis and frequencies of IL-17A<sup>+</sup>CD90.2<sup>+</sup> and IFN $\gamma$ <sup>+</sup>CD90.2<sup>+</sup> cells were examined in the respective mouse groups (6 mice in each group in one experiment). (D) The infiltrating cells in large intestines (LP) were analyzed on total CD4<sup>+</sup> T cells. (E and F) iTreg- Foxp3 loss were compared in SP and LN, cells were gated on CD90.1<sup>+</sup>. Representative results (mean  $\pm$  SEM) from four independent experiments are shown. Statistical analyses were performed using Student's t test. \*\*P<0.01; \*\*\*P<0.001; ns, not significant.

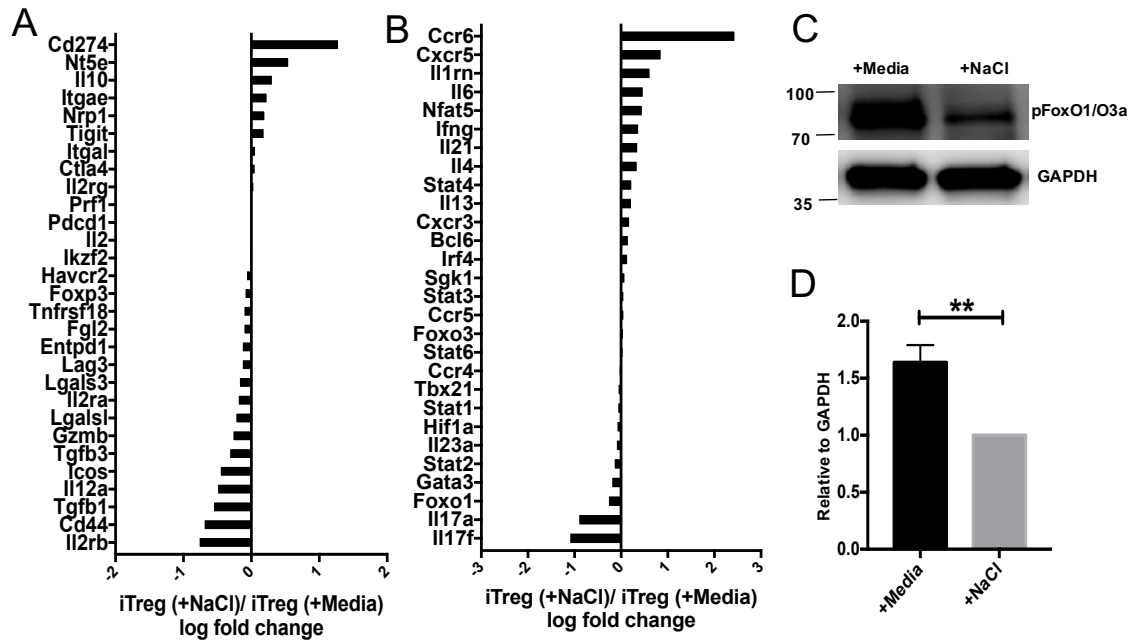

**Figure S4. High-salt condition does not significantly change the RNA signatures related to immunoregulation and pro-inflammation features of iTreg subset. Related to Figure 1-4.**

(A and B) iTregs were induced normally as in Fig. S1 and re-stimulated for 3 days with anti-CD3/CD28 microbeads (5 cells per bead) and IL-2 (50 U/ml) in the presence (+NaCl) or absence (Media) of an additional 40 Mm NaCl prior to being analyzed via RNAseq. (C and D) Protein level of phosphorylation of FoxO1/FoxO3a as determined by western blot after NaCl treatment. Representative results (mean  $\pm$  SEM) from three independent experiments are shown. Statistical analyses were performed using Student's t test. \*\*P<0.01.
